# Supplementary material for: Antibiofilm activity of Parkia javanica against Pseudomonas aeruginosa: a study with fruit extract
Source: Royal Society of Chemistry journal article supplement (doi:10.1039/c6ra24603f), 2017-01-01

**A**

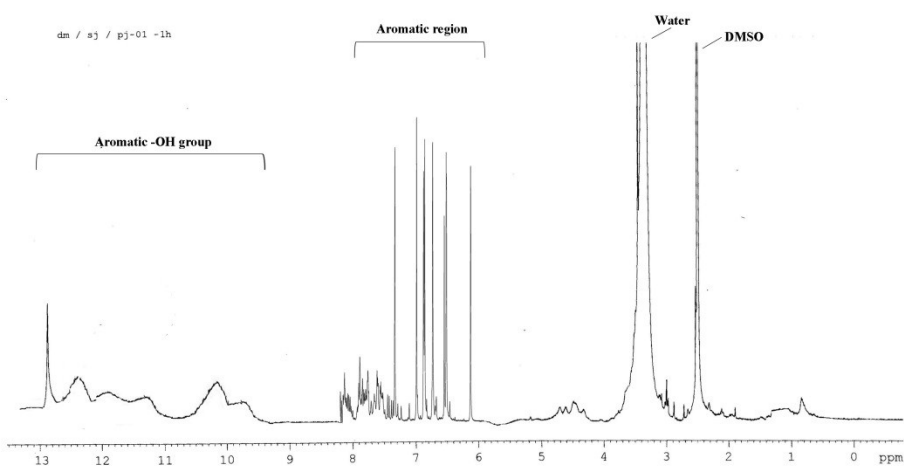

**B**

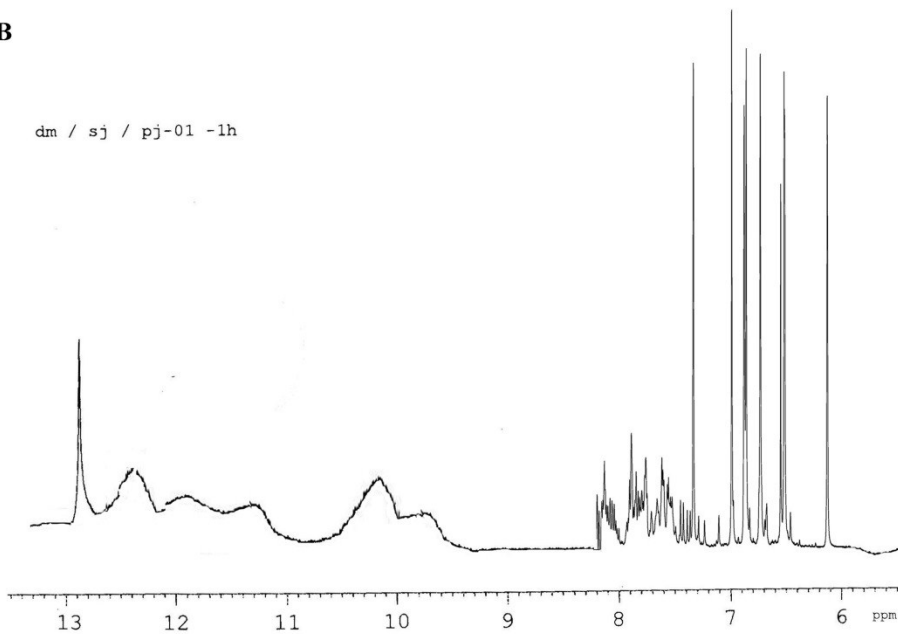

**Figure Legend:**

**Supplementary Figure 1:** (A) <sup>1</sup>H NMR spectroscopic data of PJE (B) Extension of the <sup>1</sup>H NMR spectra of PJE in the range of 6 ppm to 13.5 ppm for analysis of aromatic region and aromatic -OH group.

Contour plot of C3 (% inhibition in pyocyanin release) Vs C2, C1

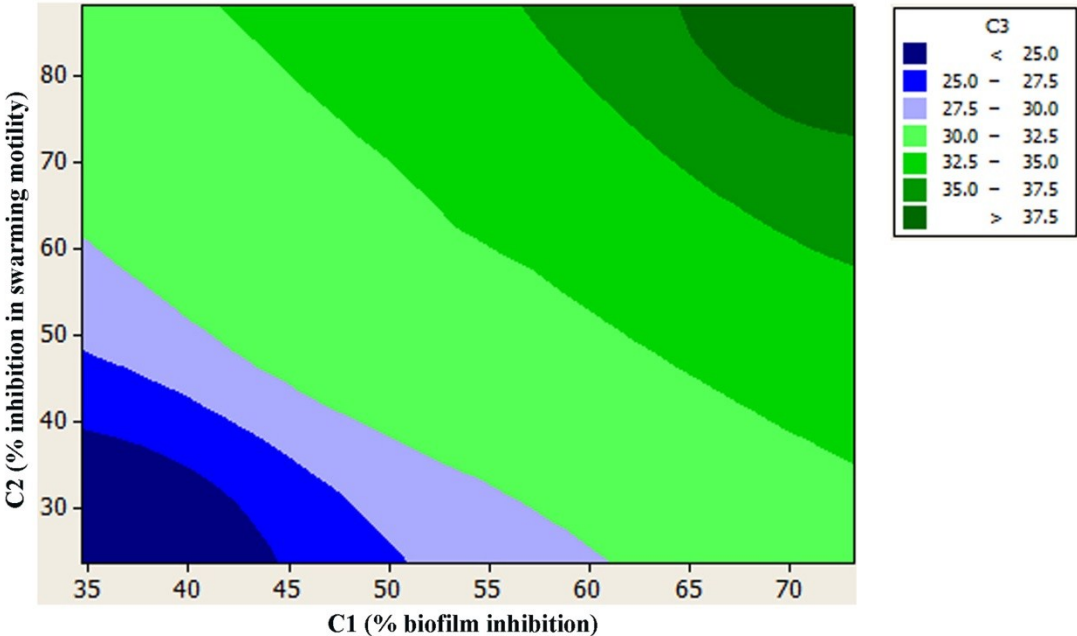

Supplement: c6ra24603f1.pdf [file c6ra24603f1.pdf]
